# Supplementary material for: An Ultra-Low-Cost RCL-Meter
Source: MDPI journal article supplement (doi:10.3390/s22062227), 2022-03-14
Supplement: s1 [file s1]

# Supplementary Materials

## A.1 – High-level routine to measure isolated resistances in C++ language

```
// Arduino built-in an isolated resistance meter according to Section 2.4

#include <SPI.h>

// Assign analog pin A0 to port PA0 at eq. circuit shown in Figure 1(f)
#define PA0  A0
// Define analog pin A3 to port PA1 at eq. circuit shown in Figure 1(f)
#define PA1  A3
// Maximum ADC value considering the 10-bit (n) of resolution: 2^(n)-1
#define NMAX 1023.0
// Analog input resistance value [Ohm(Ω)], see Table 2
#define RAIN 5.451E+06
// Pullup resistance value [Ohm(Ω)], see Table 2
#define RPU  36.66E3
// Output resistance value [Ohm(Ω)], see Table 2
#define ROUT 542.2
// BaudRate of the serial interface. Typical value is 9600, and up to 2E6
#define RxTx 2E6

void setup() {
    // Start serial monitor
    Serial.begin( RxTx );

    // Set-up port PA0 to low output
    pinMode( PA0, OUTPUT );
    digitalWrite( PA0, LOW );

    // Set-up port PA1 to low output
    pinMode( PA1, OUTPUT );
    digitalWrite( PA1, LOW );

    // Force the discharge of all capacitances
    delay( 1000 );

    // Set-up port PA0 to pull-up input
    pinMode( PA0, INPUT_PULLUP );

    // Wait 1 ms to ensure stray capacitances are fully charged
    delay(1);
}

void loop() {

    // Measure the discrete value of the analog port PA0
    float NA0 = analogRead( PA0 );

    // Calculate variable K using Eq.(2)
    float K = ( RPU * NA0 ) / ( NMAX - NA0 );

    // Calculate load resistance (R_LOAD) using Eq.(2)
    float R_LOAD = ( ( RAIN + ROUT ) * K - RAIN * ROUT ) / ( RAIN - K );

    // Print resistance value to the serial interface
    Serial.print( F( "Resistance: " ) );
    if( R_LOAD >= 1E6 ) {
```

```

    Serial.print( R_LOAD * 1E-6 , 8 );
    Serial.print( F( " M" ) );
} else if( R_LOAD >= 1E3 ) {
    Serial.print( R_LOAD * 1E-3 , 8 );
    Serial.print( F( " k" ) );
} else {
    Serial.print( R_LOAD , 8 );
    Serial.print( F( " " ) );
}
Serial.println( F( "Ohm" ) );
}

```

## A.2 – High-level routine to measure isolated capacitances through the fast acquisition mode in C++ language

```

// Arduino built-in an isolated capacitance meter through the fast
// acquisition mode, and according to Section 2.5.1

#include <SPI.h>

// Assign analog pin A0 to port PA0 at eq. circuit shown in Figure 3(a)
#define PA0  A0
// Define analog pin A3 to port PA1 at eq. circuit shown in Figure 3(a)
#define PA1  A3
// Maximum ADC value considering the 10-bit (n) of resolution: 2^(n)-1
#define NMAX 1023.0
// Stray capacitance [F(Farad)], see Table 2
#define CPIN 25.55E-12
// BaudRate of the serial interface. Typical value is 9600, and up to 2E6
#define RxTx 2E6

void setup() {
    // Start serial monitor
    Serial.begin( RxTx );

    // Set-up port PA0 to low output
    pinMode( PA0, OUTPUT );
    digitalWrite( PA0, LOW );

    // Set-up port PA1 to low output
    pinMode( PA1, OUTPUT );
    digitalWrite( PA1, LOW );
    // Force the discharge of all capacitances
    delay( 1000 );
}

void loop() {
    // Set-up port PA0 to input
    pinMode( PA0 , INPUT );

    // Set-up port PA1 to high output
    digitalWrite( PA1 , HIGH );

    // Measure the discrete value of the analog port PA0
    float NA0 = analogRead( PA0 );

    // Set-up port PA1 to low output
    digitalWrite( PA1 , LOW );
}

```

```

// Set-up port PA0 to low output
    pinMode( PA0, OUTPUT );
    digitalWrite( PA0, LOW );

// Calculate load capacitance (C_LOAD) using Eq.(4)
float C_LOAD = CPIN * NA0 / ( NMAX - NA0 );

// Print capacitance value to the serial interface
Serial.print( F( "Capacitance: " ) );
if( C_LOAD < 1E-12 ) {
    Serial.print( C_LOAD * 1E15 , 8 );
    Serial.print( F( " f" ) );
} else if( C_LOAD < 1E9 ) {
    Serial.print( C_LOAD * 1E12 , 8 );
    Serial.print( F( " p" ) );
} else if( C_LOAD < 1E6 ) {
    Serial.print( C_LOAD * 1E9 , 8 );
    Serial.print( F( " n" ) );
} else if( C_LOAD < 1E3 ) {
    Serial.print( C_LOAD * 1E6 , 8 );
    Serial.print( F( " u" ) );
} else if( C_LOAD < 1E0 ) {
    Serial.print( C_LOAD * 1E3 , 8 );
    Serial.print( F( " m" ) );
} else {
    Serial.print( C_LOAD , 8 );
    Serial.print( F( " " ) );
}
Serial.println( F( "F" ) );
}

```

### A.3 – High-level routine to measure isolated capacitances through the transient acquisition mode in C++ language

```

// Arduino built-in an isolated capacitance meter through the transient
// acquisition mode, and according to Section 2.5.2

#include <SPI.h>

// Assign analog pin A0 to port PA0 at eq. circuit shown in Figure 1(f)
#define PA0  A0
// Define analog pin A3 to port PA1 at eq. circuit shown in Figure 1(f)
#define PA1  A3
// Maximum ADC value considering the 10-bit (n) of resolution: 2^(n)-1
#define NMAX 1023.0
// Analog input resistance value [Ohm(Ω)], see Table 2
#define RAIN 5.451E+06
// Pullup resistance value [Ohm(Ω)], see Table 2
#define RPU 36.66E3
// Output resistance value [Ohm(Ω)], see Table 2
#define ROUT 542.2
// BaudRate of the serial interface. Typical value is 9600, and up to 2E6
#define RxTx 2E6

void setup() {
    // Start serial monitor
    Serial.begin( RxTx );
}

```

```

// Set-up port PA0 to low output
pinMode( PA0, OUTPUT );
digitalWrite( PA0, LOW );

// Set-up port PA1 to low output
pinMode( PA1, OUTPUT );
digitalWrite( PA1, LOW );

// Force the discharge of all capacitances
delay( 1000 );
}

void loop() {
// Set-up port PA1 to input pull-up
pinMode( PA0 , INPUT_PULLUP );

// Read timer in microseconds (us)
unsigned long TS = micros();

// Wait until TTL unit return logic '1'
float NA0 = 0;
do {
    NA0 = digitalRead(PA0);
} while (NA0 < 1.0);

// Read timer in microseconds (us)
unsigned long TE = micros();

// Measure the discrete value of the analog port PA0
NA0 = analogRead( PA0 );

// Set-up port PA0 to low output
pinMode( PA0, OUTPUT );
digitalWrite( PA0, LOW );

// Calculate elapsed time, Delta_t in seconds (s)
float T = ( (float)( TE / 1000L ) - (float)( TS / 1000L ) ) / 1000;

// Calculate total resistance (RT) value
float RT = ROUT + ( RAIN * RPU ) / ( RAIN + RPU );

// Calculate load capacitance (C_LOAD) using Eq.(7)
float C_LOAD = T / ( RT * log( NMAX / ( NMAX - NA0 ) ) );

// Print capacitance value to the serial interface
Serial.print( F( "Capacitance: " ) );
if( C_LOAD < 1E-12 ) {
    Serial.print( C_LOAD * 1E15 , 8 );
    Serial.print( F( " f" ) );
} else if( C_LOAD < 1E9 ) {
    Serial.print( C_LOAD * 1E12 , 8 );
    Serial.print( F( " p" ) );
} else if( C_LOAD < 1E6 ) {
    Serial.print( C_LOAD * 1E9 , 8 );
    Serial.print( F( " n" ) );
} else if( C_LOAD < 1E3 ) {
    Serial.print( C_LOAD * 1E6 , 8 );
    Serial.print( F( " u" ) );
} else if( C_LOAD < 1E0 ) {
    Serial.print( C_LOAD * 1E3 , 8 );
}

```

```

    Serial.print( F( " m" ) );
} else {
    Serial.print( C_LOAD , 8 );
    Serial.print( F( " " ) );
}
Serial.println( F( "F" ) );

// Discharge the capacitance
delay( T * 1000 );
}

```

## A.4 – High-level routine to measure a series RC-network in C++ language

```

// Arduino built-in a series RC-network meter according to Section 2.6

#include <SPI.h>

// Assign analog pin A0 to port PA0 at eq. circuit shown in Figure 1(f)
#define PA0 A0
// Define analog pin A3 to port PA1 at eq. circuit shown in Figure 1(f)
#define PA1 A3
// Maximum ADC value considering the 10-bit (n) of resolution: 2^(n)-1
#define NMAX 1023.0
// Analog input resistance value [Ohm(Omega)], see Table 2
#define RAIN 5.451E+06
// Pullup resistance value [Ohm(Omega)], see Table 2
#define RPU 36.66E3
// Output resistance value [Ohm(Omega)], see Table 2
#define ROUT 542.2
// BaudRate of the serial interface. Typical value is 9600, and up to 2E6
#define RxTx 2E6

void setup() {
    // Start serial monitor
    Serial.begin( RxTx );

    // Set-up port PA0 to low output
    pinMode( PA0, OUTPUT );
    digitalWrite( PA0, LOW );

    // Set-up port PA1 to low output
    pinMode( PA1, OUTPUT );
    digitalWrite( PA1, LOW );

    // Force the discharge of all capacitances
    delay( 1000 );
}

void loop() {
    // Set-up port PA0 to input pull-up
    pinMode( PA0 , INPUT_PULLUP );

    // Measure the discrete value of the analog port PA1
    float VR = analogRead( PA0 );
}

```

```

// Read timer in microseconds (us)
unsigned long TS = micros();

// Estimated new reference voltage
float VREF = NMAX - VR;

// Estimated voltage after elapsed one time constant (tau)
float VTAU = VR + 0.6322 * VREF;

// Measure the discrete value of the analog port PA0 until VC < VTAU
float VC = 0;
do {
    VC = analogRead( PA0 );
} while ( VC < VTAU );

// Read timer in microseconds (us)
unsigned long TE = micros();

// Set-up port PA0 to low output
pinMode( PA0, OUTPUT );
digitalWrite( PA0, LOW );

// Calculate elapsed time, Delta_t in seconds (s)
float T = ( (float)( TE / 1000L ) - (float)( TS / 1000L ) ) / 1000;

// Calculate variable K using Eq.(2)
float K = RPU * VR / ( NMAX - VR );

// Calculate load resistance (R_LOAD) using Eq.(2)
float R_LOAD = ( ( RAIN + ROUT ) * K - RAIN * ROUT ) / ( RAIN - K );

// Calculate total resistance (RT) value
float RT = R_LOAD + ROUT + ( RAIN * RPU / ( RAIN + RPU ) );

// Calculate load capacitance (C_LOAD) using Eq.(10)
float C_LOAD = T / ( RT * log( VREF / ( VREF - VC ) ) );

// Print resistance value to the serial interface
Serial.print( F( "Resistance: " ) );
if( R_LOAD >= 1E6 ) {
    Serial.print( R_LOAD * 1E-6 , 8 );
    Serial.print( F( " M" ) );
} else if( R_LOAD >= 1E3 ) {
    Serial.print( R_LOAD * 1E-3 , 8 );
    Serial.print( F( " k" ) );
} else {
    Serial.print( R_LOAD , 8 );
    Serial.print( F( " " ) );
}
Serial.print( F( "Ohm  " ) );

// Print capacitance value to the serial interface
Serial.print( F( "Capacitance: " ) );
if( C_LOAD < 1E-12 ) {
    Serial.print( C_LOAD * 1E15 , 8 );
    Serial.print( F( " f" ) );
} else if( C_LOAD < 1E9 ) {
    Serial.print( C_LOAD * 1E12 , 8 );
    Serial.print( F( " p" ) );
} else if( C_LOAD < 1E6 ) {

```

```

    Serial.print( C_LOAD * 1E9 , 8 );
    Serial.print( F( " n" ) );
} else if( C_LOAD < 1E3 ) {
    Serial.print( C_LOAD * 1E6 , 8 );
    Serial.print( F( " u" ) );
} else if( C_LOAD < 1E0 ) {
    Serial.print( C_LOAD * 1E3 , 8 );
    Serial.print( F( " m" ) );
} else {
    Serial.print( C_LOAD , 8 );
    Serial.print( F( " " ) );
}
Serial.println( F( "F" ) );

// Discharge the capacitance
delay( T * 1E3 );
}

```

## A.5 – High-level routine to measure a parallel RC-network in C++ language

```

// Arduino built-in a parallel RC-network meter according to Section 2.7

#include <SPI.h>

// Assign analog pin A0 to port PA0 at eq. circuit shown in Figure 1(f)
#define PA0 A0
// Define analog pin A3 to port PA1 at eq. circuit shown in Figure 1(f)
#define PA1 A3
// Maximum ADC value considering the 10-bit (n) of resolution: 2^(n)-1
#define NMAX 1023.0
// Analog input resistance value [Ohm(Omega)], see Table 2
#define RAIN 5.451E+06
// Pullup resistance value [Ohm(Omega)], see Table 2
#define RPU 36.66E3
// Output resistance value [Ohm(Omega)], see Table 2
#define ROUT 542.2
// BaudRate of the serial interface. Typical value is 9600, and up to 2E6
#define RxTx 2E6

void setup() {
    // Start serial monitor
    Serial.begin( RxTx );

    // Set-up port PA0 to low output
    pinMode( PA0, OUTPUT );
    digitalWrite( PA0, LOW );

    // Set-up port PA1 to low output
    pinMode( PA1, OUTPUT );
    digitalWrite( PA1, LOW );

    // Force the discharge of all capacitances
    delay( 1000 );
}

```

```

void loop() {
    // Estimated load resistance (R_LOAD) and capacitance (C_LOAD) values
    float R_LOAD = 1E1;
    float C_LOAD = 1E-6;

    // Estimated total resistance (RT) value
    float RT = RAIN * RPU / ( RAIN + RPU );
    RT = RT * ( ROUT + R_LOAD) / ( RT + ( ROUT + R_LOAD ) );

    // Estimated time constant (tau) of the RC circuit in milliseconds (ms)
    float tau = RT * C_LOAD * 1000;

    // Set-up port PA0 to input pull-up
    pinMode( PA0 , INPUT_PULLUP );

    // Read timer in microseconds (us)
    unsigned long TS = micros();

    // Wait until t > TAU
    delay( tau );

    // Read timer in microseconds (us)
    unsigned long TE = micros();

    // Measure the discrete value of the analog port PA0
    float VC = analogRead( PA0 );

    // Measure elapsed time, Delta_t in seconds (s)
    float T = ( (float)( TE / 1000L ) - (float)( TS / 1000L ) ) / 1000;

    // Wait until t > 5 * TAU, NOTE: it already elapsed t = tau
    delay( tau * 4 );

    // Measure the discrete value of the analog port PA0
    float VF = analogRead( PA0 );

    // Set-up port PA0 to low output
    pinMode( PA0, OUTPUT );
    digitalWrite( PA0, LOW );

    // Calculate variable K using Eq.(2)
    float K = ( RPU * VF ) / ( NMAX - VF );

    // Calculate load resistance (R_LOAD) using Eq.(2)
    R_LOAD = ( ( RAIN + ROUT ) * K - RAIN * ROUT ) / ( RAIN - K );

    // Calculate total resistance (RT) value
    RT = RAIN * RPU / ( RAIN + RPU );
    RT = RT * ( ROUT + R_LOAD) / ( RT + ( ROUT + R_LOAD ) );

    // Calculate load capacitance (C_LOAD) using Eq.(12)
    C_LOAD = T / ( RT * log( VF / ( VF - VC ) ) );

    // Print resistance value to the serial interface
    Serial.print( F( "Resistance: " ) );
    if( R_LOAD >= 1E6 ) {
        Serial.print( R_LOAD * 1E-6 , 8 );
        Serial.print( F( " M" ) );
    } else if( R_LOAD >= 1E3 ) {
        Serial.print( R_LOAD * 1E-3 , 8 );
        Serial.print( F( " k" ) );
    }
}

```



```

    } else {
        Serial.print( R_LOAD , 8 );
        Serial.print( F( " " ) );
    }
    Serial.print( F( "Ohm  " ) );

    // Print capacitance value to the serial interface
    Serial.print( F( "Capacitance: " ) );
    if( C_LOAD < 1E-12 ) {
        Serial.print( C_LOAD * 1E15 , 8 );
        Serial.print( F( " f" ) );
    } else if( C_LOAD < 1E9 ) {
        Serial.print( C_LOAD * 1E12 , 8 );
        Serial.print( F( " p" ) );
    } else if( C_LOAD < 1E6 ) {
        Serial.print( C_LOAD * 1E9 , 8 );
        Serial.print( F( " n" ) );
    } else if( C_LOAD < 1E3 ) {
        Serial.print( C_LOAD * 1E6 , 8 );
        Serial.print( F( " u" ) );
    } else if( C_LOAD < 1E0 ) {
        Serial.print( C_LOAD * 1E3 , 8 );
        Serial.print( F( " m" ) );
    } else {
        Serial.print( C_LOAD , 8 );
        Serial.print( F( " " ) );
    }
    Serial.println( F( "F" ) );

    // Discharge the capacitance
    delay( 5 * T * 1E3 );
}

```

## A.6 – High-level routine to measure an isolated inductance in C++ language

```

// Arduino built-in an isolated inductance meter through the transient
// acquisition mode, and according to Section 2.8

#include <SPI.h>

// Assign analog pin A0 to port PA0 at eq. circuit shown in Figure 1(f)
#define PA0  A0
// Define analog pin A3 to port PA1 at eq. circuit shown in Figure 1(f)
#define PA1  A3
// Maximum ADC value considering the 10-bit (n) of resolution: 2^(n)-1
#define NMAX 1023.0
// Analog input resistance value [Ohm(Ohm)], see Table 2
#define RAIN 5.451E+06
// Pullup resistance value [Ohm(Ohm)], see Table 2
#define RPU  36.66E3
// Output resistance value [Ohm(Ohm)], see Table 2
#define ROUT 542.2
// BaudRate of the serial interface. Typical value is 9600, and up to 2E6
#define RxTx 2E6

// Inductance value
float L_LOAD = 0;

```

```

// Measured discrete value by the ADC unit
float NA1      = 0;
// Measured elapsed time until TTL unit return logic '0'
float T        = 0;
// Reference time, supporting variables
unsigned long TS = 0;
unsigned long TE = 0;

void setup() {
    // Start serial monitor
    Serial.begin( RxTx );

    // Set-up port PA0 to low output
    pinMode( PA0, OUTPUT );
    digitalWrite( PA0, LOW );

    // Set-up port PA1 to low output
    pinMode( PA1, OUTPUT );
    digitalWrite( PA1, LOW );

    // Force the discharge of all inductances
    delay( 1000 );
}

void loop() {
    // Set-up port PA1 to input pull-up
    pinMode( PA1 , INPUT_PULLUP );

    // Read timer in microseconds (us)
    TS = micros();

    // Wait until TTL unit return logic '0'
    do {
        NA0 = digitalRead(PA0);
    } while (NA0 > 0.0);

    // Read timer in microseconds (us)
    TE = micros();

    // Measure the discrete value of the analog port PA0
    NA0 = analogRead( PA0 );

    // Set-up port PA0 to low output
    pinMode( PA0, OUTPUT );
    digitalWrite( PA0, LOW );

    // Calculate elapsed time, Delta_t in seconds (s)
    float T = ( (float)( TE / 1000L ) - (float)( TS / 1000L ) ) / 1000;

    // Calculate total resistance (RT) value
    float RT = ROUT + ( RAIN * RPU ) / ( RAIN + RPU );

    // Calculate load inductance (L_LOAD) using Eq.(14)
    L_LOAD = T * RT / log( NMAX / ( NMAX - NA0 ) );
    // Print inductance value to the serial interface
    Serial.print( F( "Inductance: " ) );
    if( L_LOAD < 1E-12 ) {
        Serial.print( L_LOAD * 1E15 , 8 );
        Serial.print( F( " f" ) );
    } else if( L_LOAD < 1E9 ) {
        Serial.print( L_LOAD * 1E12 , 8 );
    }
}

```

```

    Serial.print( F( " p" ) );
} else if( L_LOAD < 1E6 ) {
    Serial.print( L_LOAD * 1E9 , 8 );
    Serial.print( F( " n" ) );
} else if( L_LOAD < 1E3 ) {
    Serial.print( L_LOAD * 1E6 , 8 );
    Serial.print( F( " u" ) );
} else if( L_LOAD < 1E0 ) {
    Serial.print( L_LOAD * 1E3 , 8 );
    Serial.print( F( " m" ) );
} else {
    Serial.print( L_LOAD , 8 );
    Serial.print( F( " " ) );
}
Serial.println( F( "H" ) );

// Discharge the inductance
digitalWrite( PA0, HIGH );
delay( T * 1E3 );
digitalWrite( PA0, LOW );
}

```

## B.1 – High-level routine for fitting the Ordinary Least Squares (OLS) function to the resistance values in MATLAB language

```

function [RAIN,RPU,ROUT] = fittingOLS2R( NMAX , NA0 , RNOMINAL , guessR )
% Default values according to datasheet of: RAIN, RPU and ROUT
% Consult Table 1
RAIN = 100E6;
RPU  = 39E3;
ROUT = 600;
if nargin == 3
    guessR = [ RPU RAIN ROUT ];
end % END if( nargin )
% Define the fit function (func) through three parameters to fit.
% It is easier to gather them in vector R = [R(1) R(2) R(3)]
% R(1) = RPU
% R(2) = ROUT
% R(3) = RAIN

% The output of func is the estimate of R_LOAD from the PA0 reading
func = @(R,A0) ( R(1) .* A0 ./ ( NMAX - A0 ) .* ( R(2) + R(3) ) -
    R(2) * R(3) ) ./ ( R(3) - R(1) .* A0 ./ ( NMAX - A0 ) );

% Our "x" is the measured NA0 input values
A0 = NA0;

% Our "y", is the nominal values of the resistors
y = RNOMINAL;

% Define OLS function
OLS = @(R) sum( ( log( func( R , A0 ) ) - log( y ) ) .^ 2 );

% Options for fminsearch
opts = optimset( 'MaxFunEvals' , 600000 , 'MaxIter' , 100000 );

% Apply fminsearch to find the minimum of the cost function using the
% guessR input

```

```

[ RFIT , err ] = fminsearch( OLS , guessR , opts ) ;

% Use 'fminsearch' to minimise the 'OLS' function
RPU  = RFIT(1);
ROUT = RFIT(2);
RAIN = RFIT(3);

end % END fittingOLS2R()

```

## B.2 – High-level routine for fitting the Ordinary Least Squares (OLS) function to the capacitance values in MATLAB language

```

function CPIN = fittingOLS2C( NMAX , NA0 , RNOMINAL , guessC )
% Default CPIN value according to datasheet, consult Table 1
CPIN = 24.48E-12;
if nargin == 3
    guessC = CPIN;
end % END if( nargin )
% Define the fit function (func) through the parameters to fit:
% C(1) = CPIN

% The output of func is the estimate of C_LOAD from the PA0 reading
func = @(C,A0) C(1) .* A0 ./ ( NMAX - A0 );

% Our "x" is the measured NA0 input values
A0 = NA0;

% Our "y", is the nominal values of the capacitors
y = CNOMINAL;

% Define OLS function
OLS = @(C) sum( ( log( func( C , A0 ) ) - log( y ) ) .^ 2 );

% Options for fminsearch
opts = optimset( 'MaxFunEvals' , 600000 , 'MaxIter' , 100000 );

% Apply fminsearch to find the minimum of the cost function using the
% guessC input
[ CFIT , err ] = fminsearch( OLS , guessC , opts );

% Use 'fminsearch' to minimise the 'OLS' function
CPIN = CFIT(1);
end % END fittingOLS2C()

```
